# Supplementary figures and images for: Curcumin liposomes alleviate senescence of bone marrow mesenchymal stem cells by activating mitophagy
Source: PubMed Central journal article supplement — Sci Rep. 2024 Dec 28;14:31291. doi: 10.1038/s41598-024-82614-1 (PMC11682429; doi:10.1038/s41598-024-82614-1), 2024-12-28

Fig.3B

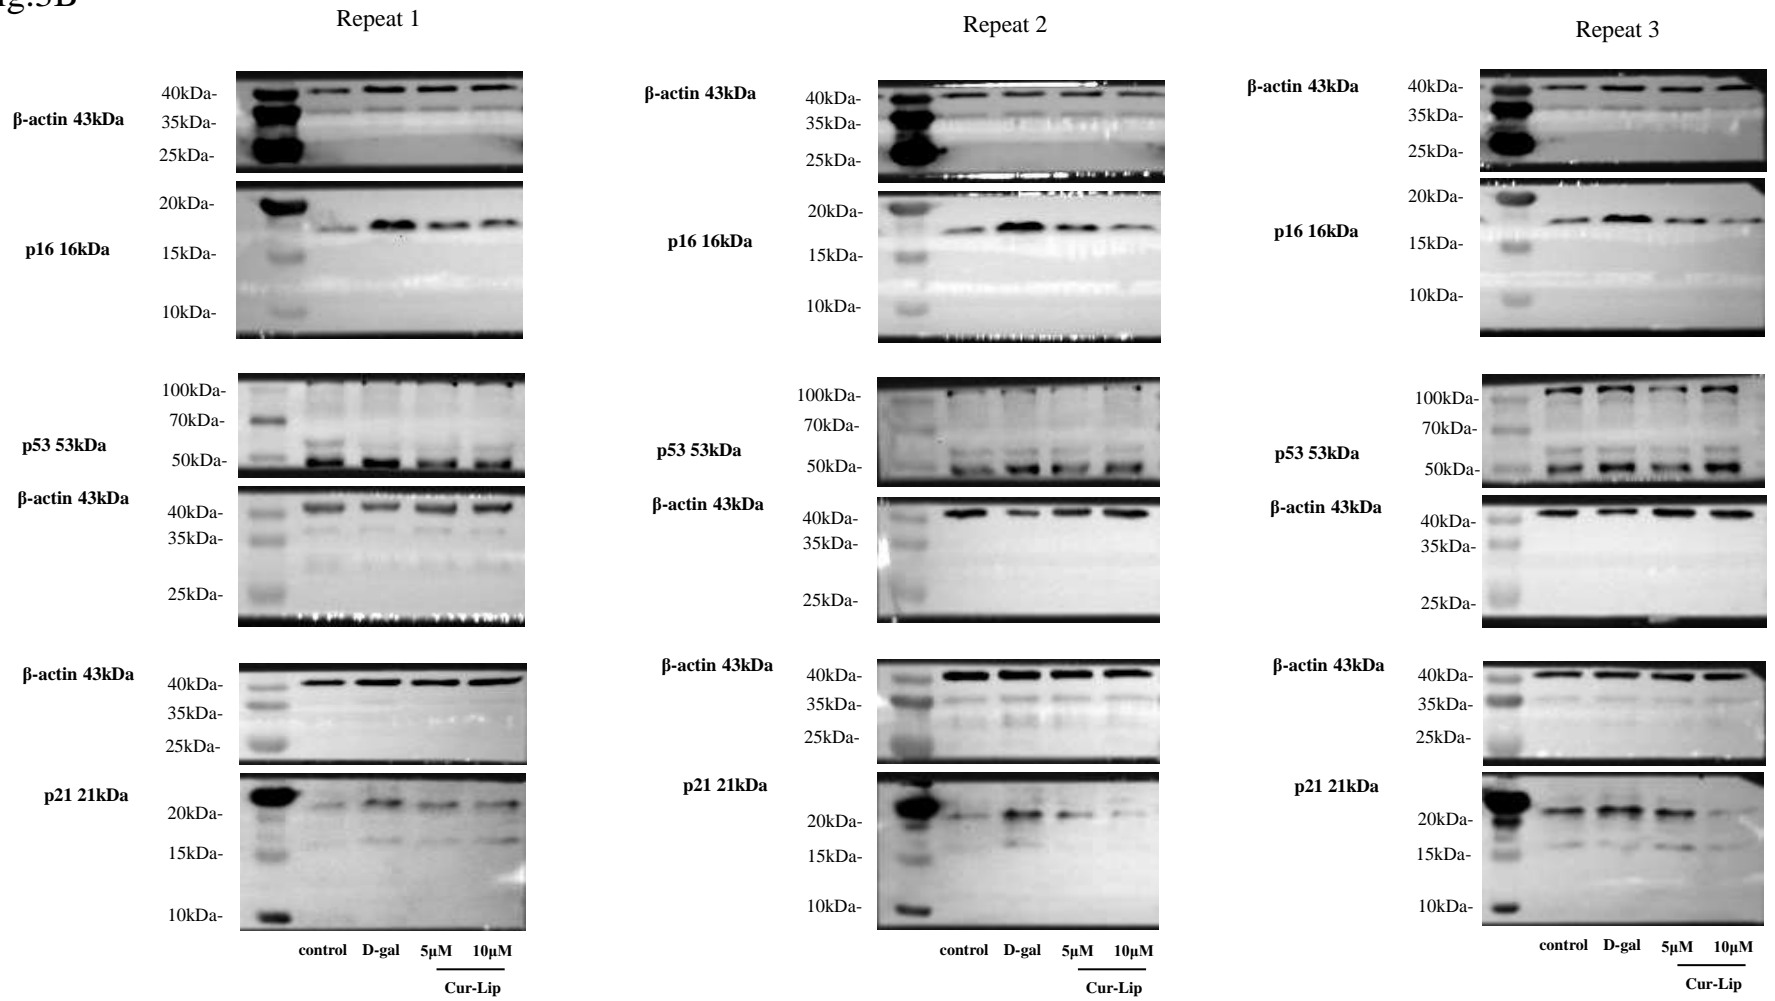

**Fig.6B**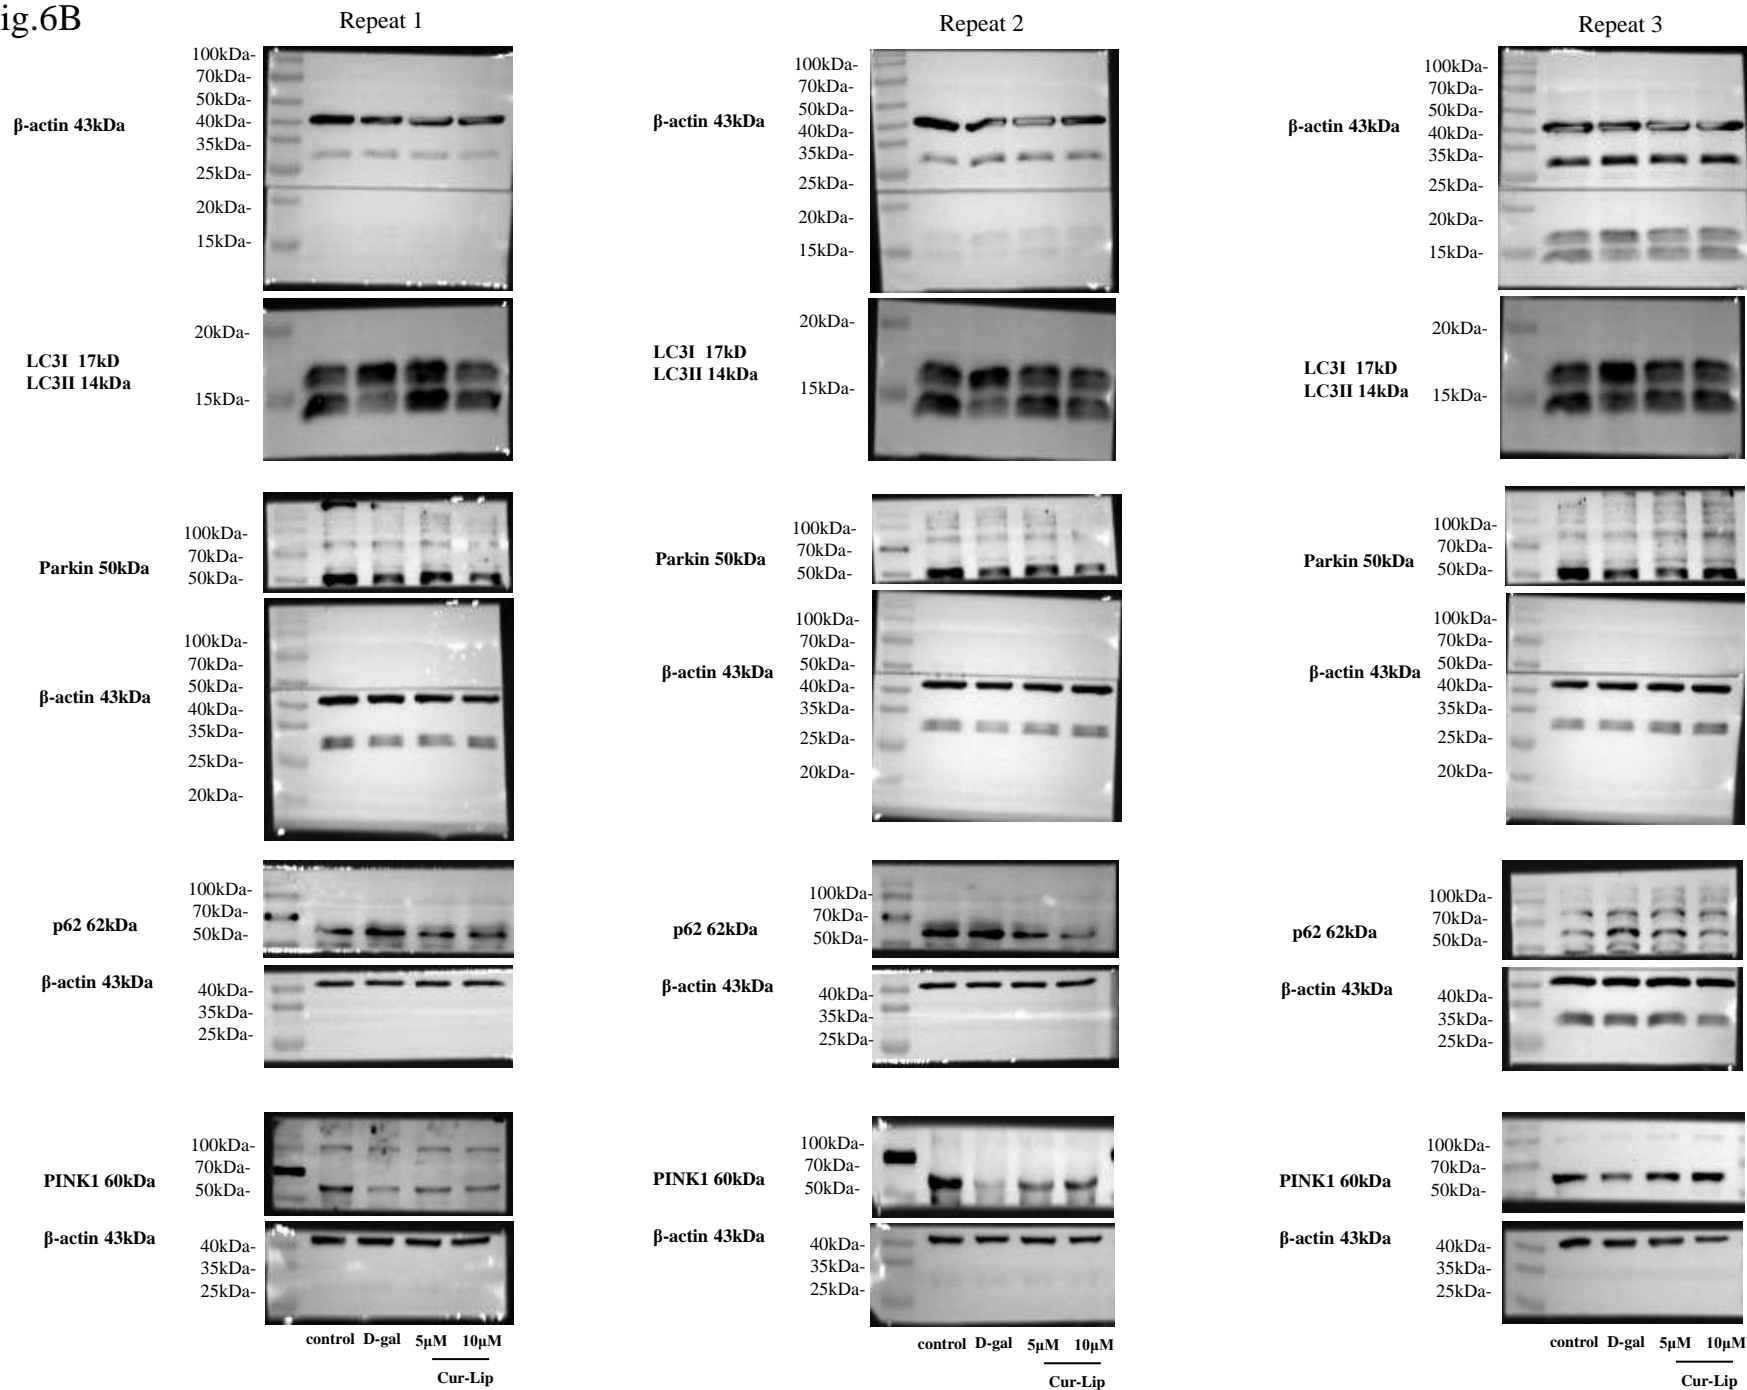

Fig.7A

Repeat 1

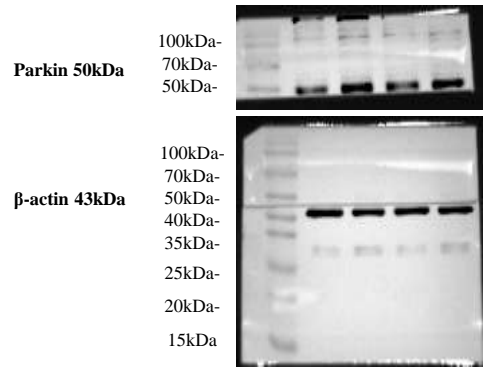

Repeat 2

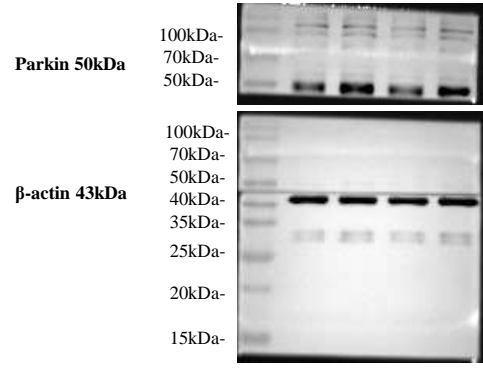

Repeat 3

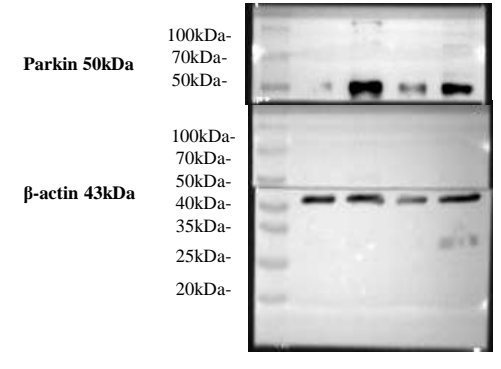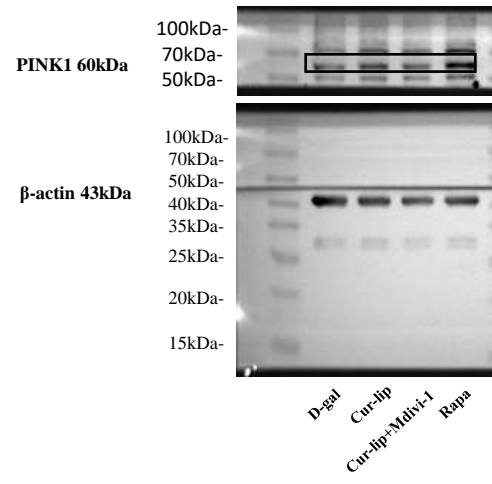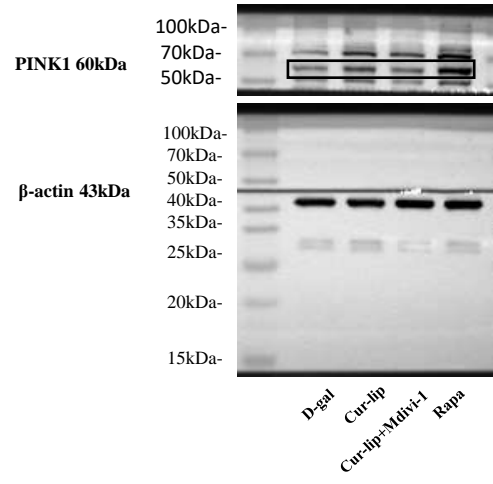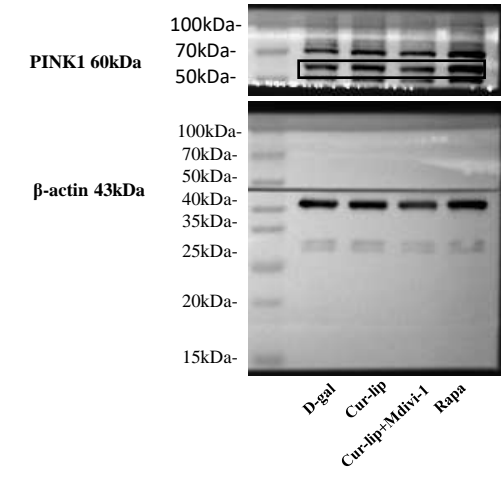

Supplement: 41598_2024_82614_MOESM5_ESM.pdf [file 41598_2024_82614_MOESM5_ESM.pdf]
